# Supplementary material
Source: PubMed Central journal article supplement (PMC4670588)
Supplement: NIHMS734629-supplement-2.pdf [file NIHMS734629-supplement-2.pdf]

**Cell Reports**

**Supplemental Information**

**Identification of the HIV-1 Vif and human APOBEC3G protein interface**

**Michael Letko, Thijs Booiman, Neeltje Kootstra, Viviana Simon, Marcel**

**Ooms**

## SUPPLEMENTAL DATA

### Supplemental figures and legends

Figure S1

| Patient Vif residues |    | Counters A3G-125R? |           |
|----------------------|----|--------------------|-----------|
| 19                   | 22 | ✗                  | ✓         |
| R                    | K  | 40 (76.9%)         |           |
| K                    | K  | 7 (13.7%)          |           |
| R                    | N  | 2 (3.9%)           | 2 (14.2%) |
| R                    | H  | 3 (5.9%)           | 1 (7.1%)  |
| S                    | K  |                    | 9 (64.3%) |
| R                    | V  |                    | 1 (7.1%)  |
| K                    | N  |                    | 1 (7.1%)  |
| <b>Total</b>         |    | <b>52</b>          | <b>14</b> |

**Figure S1. Amino acid identities of Vif at positions 19 and 22 (Related to Figure 3).**

Our Amsterdam Cohort Vif panel comprises 66 Vif alleles from 35 chronically infected, untreated HIV+ patients. The table shows the amino acids at positions 19 and 22 of each Vif grouped by whether they do or do counteract A3G-125R. The absolute number and % of 19+22 amino acid pairs are indicated.

**Figure S2**

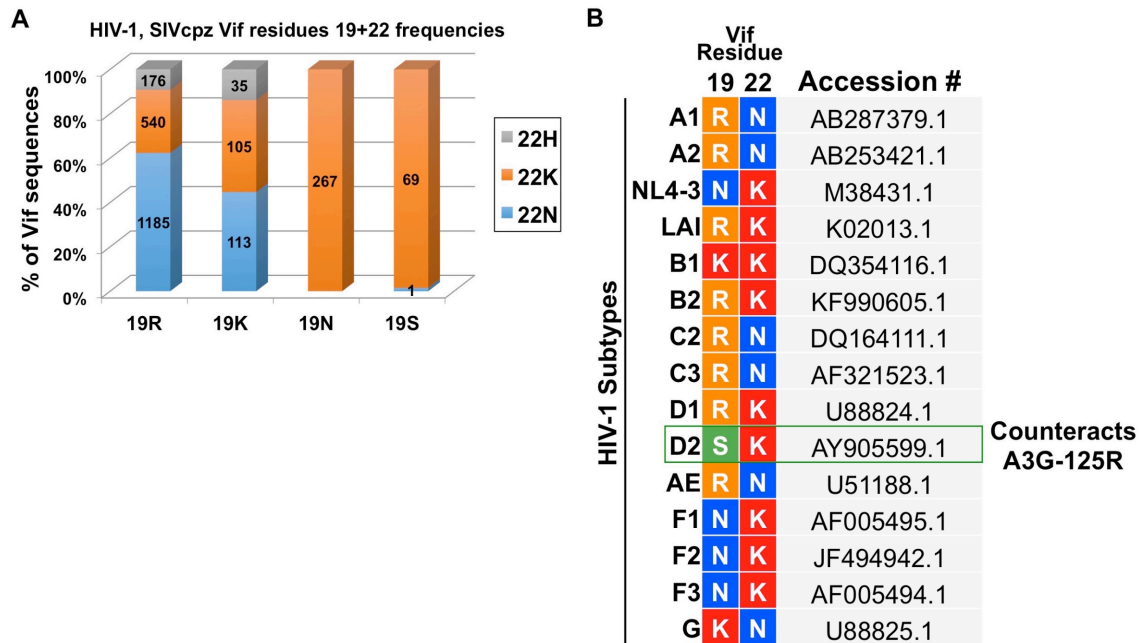

**Figure S2. Amino acid identities of Vif at positions 19 and 22 (Related to Figure 4).**

(A) HIV-1 and SIVcpz Vif alignments were obtained from the Los Alamos HIV sequence database. Sequences containing premature stop codons (\*) or other characters (# and X) were excluded. Amino acid frequencies at positions 19 and 22 of a total of 2527 Vif sequences were calculated using BioEdit Sequence Alignment Editor. The relative and absolute frequencies of amino acids found at positions 19 and 22 of Vif are shown grouped by the amino acid identity at position 19.

(B) The amino acids at positions 19 and 22 of Vif are shown for the subtype Vif panel used in experiments depicted in Figure 2C. Vif D2 of subtype D is the only Vif that displays partial activity against A3G-125R.

**Figure S3**

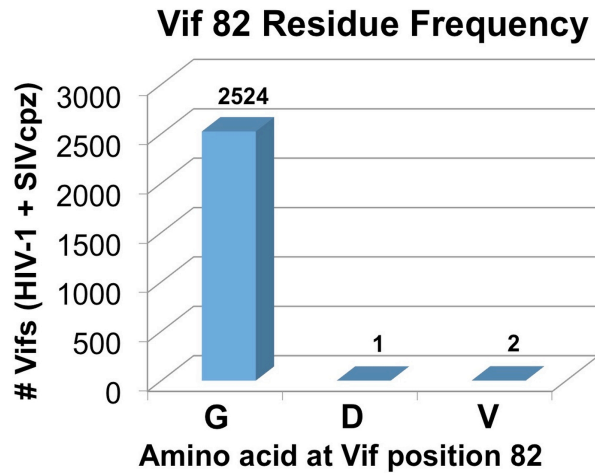

**Figure S3. Vif 82G is highly conserved among HIV-1 and SIVcpz Vifs alleles (Related to Figure 5).**

HIV-1 and SIVcpz Vif alignments were obtained from the Los Alamos HIV sequence database. Sequences containing premature stop codons (\*) or other characters (# and X) were excluded. The amino acids found at position 82 of a total of 2,527 sequences were determined using BioEdit Sequence Alignment Editor. Only three amino acids were found at position 82 and the respective distribution is shown.

Figure S4

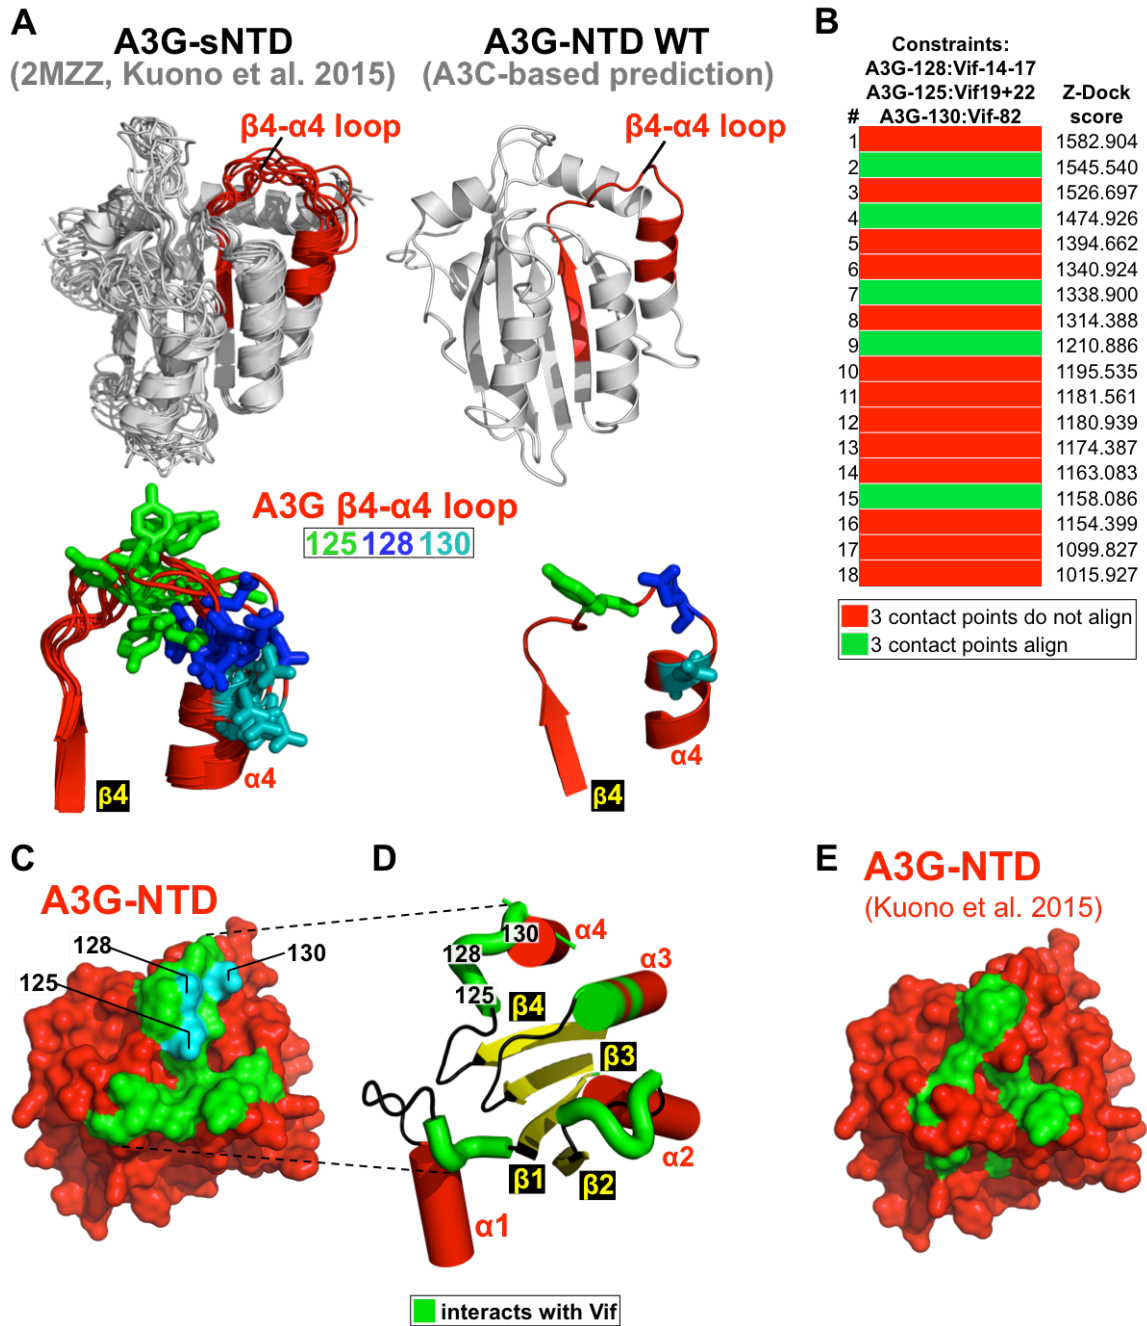

Figure S4. Protein docking of Vif and A3G and comparison of the Vif binding site of Kuono et al. 2015 (Related to Figure 7).

(A) Ten structural states from the recently published NMR structure of a soluble variant of the A3G-NTD (2MZZ) were overlaid (left) and compared with the A3C-

based (PDB 3V0W), predicted structure for the A3G-NTD used in this study (right). The entire A3G-NTD is shown in the upper panels with the  $\beta$ 4- $\alpha$ 4 loop indicated in red. Shown below, the  $\beta$ 4- $\alpha$ 4 loop is enlarged with residues 125 (green), 128 (blue) and 130 (cyan) are depicted. **(B)** The top Z-dock output structures ranked by Z-dock scores are shown. Constraints were applied to force docking of the specific three contact points (A3G-128:Vif-14-17, A3G-125:Vif-19+22, A3G-130:Vif-82). Output structures were analyzed for alignment of the three identified amino acid pairs. The model structures in which the three contact points aligned properly are indicated in green and are identical or structurally very similar. **(C, D)** A closer inspection of the interacting surface of A3G based on the Vif-A3G model analyzed with UCSF chimera software (indicated in green) shows that the A3G surface interacting with Vif consists of the loops between  $\alpha$ -1 and  $\beta$ -1,  $\alpha$ -2 and  $\beta$ -2,  $\beta$ -3 and  $\alpha$ -3 and between  $\beta$ -4 and  $\alpha$ -4. **(E)** The Vif surface interacting with A3G based on the Vif-A3G model (indicated in green), largely overlaps with the Vif residues that were determined experimentally to be important for counteracting with A3G (Kouno et al., 2015).

## Supplemental Tables

**Table S1.** Literature-derived Vif residues important for A3G counteraction (Related to Figure 6).

| Publication                  | PMID     | Vif residues           | Affects A3G counteraction | Affects A3C/A3F/A3H counteraction* | A3G Specific?# |
|------------------------------|----------|------------------------|---------------------------|------------------------------------|----------------|
| (Wichroski et al., 2005)     | 15537645 | 9                      | yes                       | N.T.                               |                |
| (Simon et al., 2005)         | 16201018 | 22, 40, 45             | <b>yes</b>                | <b>no</b>                          | <b>yes</b>     |
| (Santa-Marta et al., 2005)   | 15611076 | 73-99, 169-192         | yes                       | N.T.                               |                |
| (Schröfelbauer et al., 2006) | 16731937 | 14-17                  | <b>yes</b>                | <b>no</b>                          | <b>yes</b>     |
| (Tian et al., 2006)          | 16501124 | 5, 11, 21, 38, 89      | yes                       | yes                                | no             |
| (Russell and Pathak, 2007)   | 17522216 | 40-44, 48              | <b>yes</b>                | <b>no</b>                          | <b>yes</b>     |
| (Mehle et al., 2007)         | 17898068 | 42, 43                 | <b>yes</b>                | <b>no</b>                          | <b>yes</b>     |
| (Goila-Gaur et al., 2008)    | 18023836 | 23-43                  | yes                       | N.T.                               |                |
| (Donahue et al., 2008)       | 18499212 | 161-164                | yes                       | yes                                | no             |
| (He et al., 2008)            | 18619467 | 52-72                  | yes                       | yes                                | no             |
| (Yamashita et al., 2008)     | 18603011 | 21, 32, 38, 40, 43, 69 | <b>yes</b>                | <b>no</b>                          | <b>yes</b>     |
| (Zhang et al., 2008)         | 18619467 | 22, 41, 42             | <b>yes</b>                | <b>no</b>                          | <b>yes</b>     |
| (Pery et al., 2009)          | 19109396 | 69-72                  | yes                       | N.T.                               |                |
| (Chen et al., 2009)          | 19535450 | 22, 26, 30, 40         | <b>yes</b>                | <b>no</b>                          | <b>yes</b>     |
| (Dang et al., 2009)          | 19535447 | 22, 26                 | <b>yes</b>                | <b>no</b>                          | <b>yes</b>     |
| (Dang et al., 2010a)         | 20335268 | 81-89                  | yes                       | yes                                | no             |
| (Dang et al., 2010b)         | 20592083 | 96-107                 | yes                       | yes                                | no             |
| (Reingewertz et al., 2013)   | 23545135 | 8-45, 83-99, 154-192   | yes                       | N.T.                               |                |

N.T. indicates that the Vif mutants have not been tested with A3C, A3F or A3H

\* indicates whether the Vif mutants were also tested against A3C, A3F or A3H

# Vif mutations are regarded A3G specific when the Vif mutant fails to counteract A3G, but remains active against A3C, A3F or A3H

**Table S2.** Summary of interacting residues (Related to Figure 6).

|                    |              |                | <b>A3G Variant</b> |             |             |             |
|--------------------|--------------|----------------|--------------------|-------------|-------------|-------------|
|                    |              |                | <b>WT</b>          | <b>125R</b> | <b>128K</b> | <b>130R</b> |
| <b>Vif Variant</b> | <b>NL4-3</b> | <b>WT</b>      | +                  | -           | -           | -           |
|                    |              | <b>SEMQ</b>    | +/-                | +/-         | +           | +           |
|                    |              | <b>15E</b>     | +/-                | +/-         | +           | +           |
|                    |              | <b>15A</b>     | +                  | +/-         | -           | +/-         |
|                    |              | <b>82D</b>     | +/-                | -           | -           | +           |
|                    |              | <b>82K</b>     | +                  | N.T.        | N.T.        | -           |
|                    | <b>LAI</b>   | <b>WT</b>      | +                  | -           | -           | -           |
|                    |              | <b>19S</b>     | +                  | +/-         | N.T.        | N.T.        |
|                    |              | <b>22V</b>     | +                  | +/-         | N.T.        | N.T.        |
|                    |              | <b>19S+22V</b> | -                  | +           | -           | -           |

\*N.T. = Not tested. "+" indicates Vif rescues infectivity, "-" indicates restriction, "+/-" indicates partial rescue.



## Supplemental References (Related to Table S1)

Chen, G., He, Z., Wang, T., Xu, R., and Yu, X.F. (2009). A patch of positively charged amino acids surrounding the human immunodeficiency virus type 1 Vif SLVx4Yx9Y motif influences its interaction with APOBEC3G. *Journal of virology* **83**, 8674-8682.

Dang, Y., Davis, R.W., York, I.A., and Zheng, Y.H. (2010a). Identification of 81LGxGxxlxW89 and 171EDRW174 domains from human immunodeficiency virus type 1 Vif that regulate APOBEC3G and APOBEC3F neutralizing activity. *Journal of virology* **84**, 5741-5750.

Dang, Y., Wang, X., York, I.a., and Zheng, Y.-H. (2010b). Identification of a critical T(Q/D/E)x5ADx2(I/L) motif from primate lentivirus Vif proteins that regulate APOBEC3G and APOBEC3F neutralizing activity. *Journal of virology* **84**, 8561-8570.

Dang, Y., Wang, X., Zhou, T., York, I.a., and Zheng, Y.-H. (2009). Identification of a novel WxSLVK motif in the N terminus of human immunodeficiency virus and simian immunodeficiency virus Vif that is critical for APOBEC3G and APOBEC3F neutralization. *Journal of virology* **83**, 8544-8552.

Donahue, J.P., Vetter, M.L., Mukhtar, N.A., and D'Aquila, R.T. (2008). The HIV-1 Vif PPLP motif is necessary for human APOBEC3G binding and degradation. *Virology* **377**, 49-53.

Goila-Gaur R, Khan MA, Miyagi E, Kao S, Opi S, Takeuchi H, Strebel K. (2008). HIV-1 Vif promotes the formation of high molecular mass APOBEC3G complexes. *Virology* **372**, 136-146.

He, Z., Zhang, W., Chen, G., Xu, R., and Yu, X.F. (2008). Characterization of conserved motifs in HIV-1 Vif required for APOBEC3G and APOBEC3F interaction. *Journal of molecular biology* **381**, 1000-1011.

Mehle, A., Wilson, H., Zhang, C., Brazier, A.J., McPike, M., Pery, E., and Gabuzda, D. (2007). Identification of an APOBEC3G binding site in human immunodeficiency virus type 1 Vif and inhibitors of Vif-APOBEC3G binding. *Journal of virology* **81**, 13235-13241.

Pery, E., Rajendran, K.S., Brazier, A.J., and Gabuzda, D. (2009). Regulation of APOBEC3 proteins by a novel YXXL motif in human immunodeficiency virus type 1 Vif and simian immunodeficiency virus SIVagm Vif. *Journal of virology* **83**, 2374-2381.

Reingewertz, T.H., Britan-Rosich, E., Rotem-Bamberger, S., Viard, M., Jacobs, A., Miller, A., Lee, J.Y., Hwang, J., Blumenthal, R., Kotler, M., *et al.* (2013).

Mapping the Vif-A3G interaction using peptide arrays: a basis for anti-HIV lead peptides. *Bioorganic & medicinal chemistry* *21*, 3523-3532.

Russell, R.a., and Pathak, V.K. (2007). Identification of two distinct human immunodeficiency virus type 1 Vif determinants critical for interactions with human APOBEC3G and APOBEC3F. *Journal of virology* *81*, 8201-8210.

Santa-Marta, M., da Silva, F.A., Fonseca, A.M., and Goncalves, J. (2005). HIV-1 Vif can directly inhibit apolipoprotein B mRNA-editing enzyme catalytic polypeptide-like 3G-mediated cytidine deamination by using a single amino acid interaction and without protein degradation. *The Journal of biological chemistry* *280*, 8765-8775.

Schröfelbauer, B., Senger, T., Manning, G., and Landau, N.R. (2006). Mutational alteration of human immunodeficiency virus type 1 Vif allows for functional interaction with nonhuman primate APOBEC3G. *Journal of virology* *80*, 5984-5991.

Simon, V., Zennou, V., Murray, D., Huang, Y., Ho, D.D., and Bieniasz, P.D. (2005). Natural variation in Vif: differential impact on APOBEC3G/3F and a potential role in HIV-1 diversification. *PLoS pathogens* *1*, e6.

Tian, C., Yu, X., Zhang, W., Wang, T., Xu, R., and Yu, X.F. (2006). Differential requirement for conserved tryptophans in human immunodeficiency virus type 1 Vif for the selective suppression of APOBEC3G and APOBEC3F. *Journal of virology* *80*, 3112-3115.

Wichroski, M.J., Ichiyama, K., and Rana, T.M. (2005). Analysis of HIV-1 viral infectivity factor-mediated proteasome-dependent depletion of APOBEC3G: correlating function and subcellular localization. *The Journal of biological chemistry* *280*, 8387-8396.

Yamashita, T., Kamada, K., Hachio, K., Adachi, A., and Nomaguchi, M. (2008). Identification of amino acid residues in HIV-1 Vif critical for binding and exclusion of APOBEC3G/F. *Microbes and infection / Institut Pasteur* *10*, 1142-1149.

Zhang, L., Saadatmand, J., Li, X., Guo, F., Niu, M., Jiang, J., Kleiman, L., and Cen, S. (2008). Function analysis of sequences in human APOBEC3G involved in Vif-mediated degradation. *Virology* *370*, 113-121.
